# Supplementary material for: Mitochondrial Transcription Factor A (TFAM) Binds to RNA Containing 4-Way Junctions and Mitochondrial tRNA
Source: PubMed Central journal article supplement (PMC4636309; doi:10.1371/journal.pone.0142436), 2015-11-06

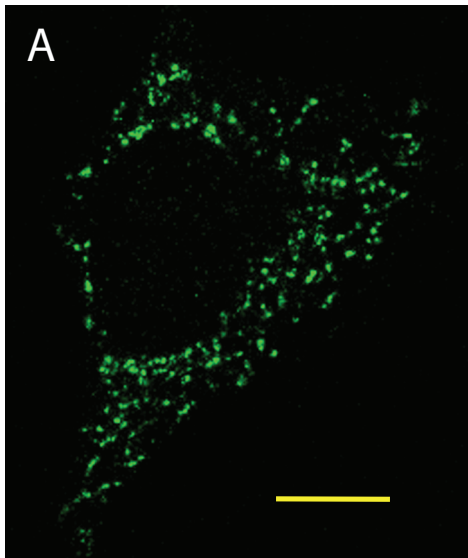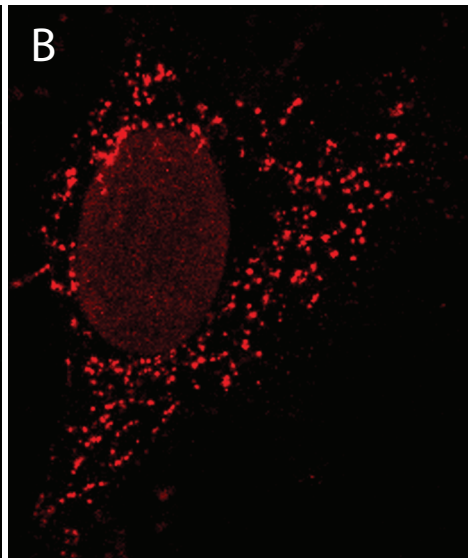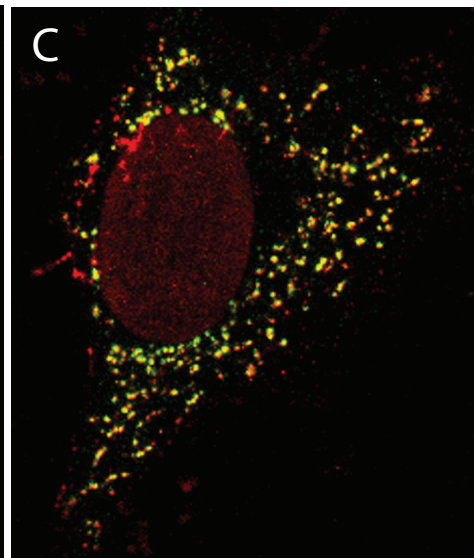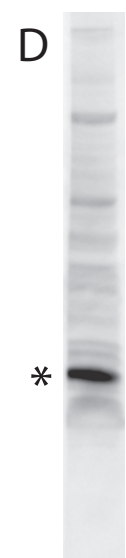

Supplement: pone.0142436.s001.pdf [file pone.0142436.s001.pdf]
